# Supplementary material for: Luminescent hybrid materials of lanthanide β-diketonate and mesoporous host through covalent and ionic bonding with anion metathesis
Source: Royal Society of Chemistry journal article supplement (doi:10.1039/c2dt30364g), 2012-01-01
Supplement: c2dt30364g.pdf [file c2dt30364g.pdf]

## Supporting information

### Calculation methods for luminescent quantum efficiency

For europium based materials, the emission quantum efficiency ( $\eta$ ) of the emitting  $^5D_0$  level can be determined on the basis of emission spectra together with the lifetimes and can be calculated using the following equation<sup>1</sup>:

$$\eta = \frac{A_r}{A_r + A_{nr}}$$

Here,  $A_r$  and  $A_{nr}$  represent the radiative and non-radiative transition rates, respectively. Among which, the  $A_r$  can be obtained by adding up the radiative rates for each  $^5D_0 \rightarrow ^7F_J$  ( $J = 0, 1, 2, 3, 4$ ) transition.

$$A_r = \sum A_{0J} = A_{00} + A_{01} + A_{02} + A_{03} + A_{04}$$

Here,  $A_{0J}$  is the experimental coefficients of spontaneous emission. The branching ratio for  $^5D_0 \rightarrow ^7F_J$  ( $J = 5, 6$ ) have been neglected since they are not detected in experiments, and can be ignored in the depopulation of  $^5D_0$  excited state. Meanwhile, because of the independence to chemical environments, the magnetic dipole transition  $^5D_0 \rightarrow ^7F_1$  can be used as an internal reference to the whole spectra. Thus, the  $A_{0J}$  can be obtained using the following equation:

$$A_{0J} = A_{01} \times \frac{I_{0J}}{I_{01}} \times \frac{\nu_{01}}{\nu_{0J}}$$

Here,  $I_{01}$  and  $I_{0J}$  the integrated intensities of the  $^5D_0 \rightarrow ^7F_1$  and  $^5D_0 \rightarrow ^7F_J$  ( $J=0-4$ ) transitions, while the  $\nu_{01}$  and  $\nu_{0J}$  the corresponding energy barycenters. According to the reports of references,  $A_{01}$  in this equation can be calculated by the expression  $A_{01} = 0.31 \times 10^{-11} n^3 (\nu_{01})^3$ , and it's value can be determine to be  $50 \text{ s}^{-1}$  approximately<sup>2</sup>.

Furthermore, the luminescent lifetime, radiative and non-radiative transition rates can be related through the following equation<sup>3</sup>:

$$\frac{1}{\tau} = A_r + A_{nr}$$

---

1 E. E. S. Teotonio, J. G. P. Espinola, H. F. Brito, O. L. Malta, S. F. Oliveira, D. L. A. de Faria and C. M. S. Izumi, *Polyhedron*, 2002, 21, 1837.

2 W. T. Carnall, H. Crosswhite, H. M. Crosswhite, *Argonne National laboratory Report*, 1978, unnumbered.

3 H. J. Zhang, W. Q. Fan, J. Feng, S. Y. Song, Y. Q. Lei and S. Dang, *Opt. Mater.*, 2011, 33, 582.
